# Supplementary material for: Scaling up an early childhood development programme through a national multisectoral approach to social protection: lessons from Chile Crece Contigo
Source: PubMed Central journal article supplement — BMJ. 2018 Dec 7;363:k4513. doi: 10.1136/bmj.k4513 (PMC6282756; doi:10.1136/bmj.k4513), 2018-12-07
Supplement: molh477295.ww1.pdf [file molh477295.ww1.pdf]

## Approach to developing the country case-study: Chile Crece Contigo

The Chile Grows with You (Chile Crece Contigo) (ChCC) case-study was led and coordinated by a working group with representation from the ministries of social development and health, and University of San Santiago at Chile. All work was conducted between March and July 2018. The working group developed the case-study using a modified multi-stakeholder dialogue approach using 4 steps:<sup>1,2</sup>

1. A review of available data was conducted, including: peer reviewed and grey literature, national health coverage surveys, the electronic monitoring and evaluation system for ChCC, the routine health information system (HIS), programme documents and reports, and evaluation studies conducted for ChCC since inception.
2. In-depth interviews with key ChCC stakeholders sampled randomly from national to community levels were conducted. Below the national level, two municipalities were randomly selected from each of the three main regions of the country; and within each, two communes. Stakeholders from different sectors at national, regional, provincial, municipality and commune levels who were involved in planning, implementation and monitoring of ChCC were interviewed as well as community members (beneficiaries) using qualitative interview guides organized by thematic area.
3. Data from stakeholder interviews were analysed using a modified Framework Method for comparing and contrasting large-scale textual data across cases.<sup>3</sup> Similarities and differences in the data were identified and relationships drawn across different parts of the analysis, resulting in descriptive or explanatory conclusions by theme. A health systems framework was developed populated by main policy and programme inputs across all interviews. Synthesized findings were triangulated, where possible, with related literature reviews and other data and summarized in a report.
4. A multi-stakeholder meeting was conducted, involving face-to-face meetings of health and development stakeholders at the national and sub-national levels to review and finalize the working report and journal article.

---

<sup>1</sup> Frost L, Hinton R, Pratt BA, Murray J, Arscott-Mills S, Jack S, et al. Using multi-stakeholder dialogues to assess policies, programmes and progress for women's, children's and adolescents' health. Bull World Health Organ. 2016 May 1;94(5):393–39

<sup>2</sup> PMNCH. Methods guide for country case studies on successful collaboration across sectors for health and sustainable development. 2018. <http://www.who.int/pmnch/knowledge/case-study-methods-guide.pdf>

<sup>3</sup> Gale NK, Heath G, Cameron E, Rashid S, Redwood S. Using the framework method for the analysis of qualitative data in multi-disciplinary health research. BMC Med Res Methodol. 2013;13(1):117. doi: <http://dx.doi.org/10.1186/1471-2288-13-117> PMID: 24047204.
